# Supplementary material for: Health indicators as a measure of individual health status: public perspectives
Source: bioRxiv or medRxiv preprint supplement (doi:10.1101/2022.03.04.22271701), 2022-03-07
Supplement: Supplementary file [file media-3.pdf]

**Appendix C.** Records from three datasets: before and after data cleaning

|                               | <b>Agreed and valid<br/>(based on<br/>validation<br/>question)</b> | <b>Incom<br/>plete<br/>records</b> | <b>Complete<br/>records</b> | <b>Invalid<br/>records (less<br/>than 3 mins)</b> | <b>Complete and valid<br/>records for analysis<br/>(after cleaning)</b> |
|-------------------------------|--------------------------------------------------------------------|------------------------------------|-----------------------------|---------------------------------------------------|-------------------------------------------------------------------------|
| Ohio<br>University<br>dataset | 389                                                                | 4                                  | 385                         | 23                                                | 362                                                                     |
| Clemson<br>dataset            | 182                                                                | 80                                 | 102                         | 5                                                 | 97                                                                      |
| ResearchM<br>atch             | 694                                                                | 9                                  | 685                         | 0                                                 | 685                                                                     |
