# Supplementary material for: Health indicators as a measure of individual health status: public perspectives
Source: bioRxiv or medRxiv preprint supplement (doi:10.1101/2022.03.04.22271701), 2022-03-07
Supplement: Supplementary file [file media-4.pdf]

## Appendix D. Codebook

| Variables                 | Range | Notes for each code                                                                                                                                                        |
|---------------------------|-------|----------------------------------------------------------------------------------------------------------------------------------------------------------------------------|
| Age                       | [1-5] | 1: < = 35<br>2: 36-45<br>3: 46-55<br>4: 56-65<br>5: > 65                                                                                                                   |
| Gender                    | [1-4] | 1: Female<br>2: Male<br>3: Transsexual<br>4: Prefer not to answer                                                                                                          |
| Professional group        | [1-5] | 1: Healthcare providers<br>2: Public health professional<br>3: Researcher who uses health indicator data<br>4: Other researchers<br>5: Other professional groups (specify) |
| Educational qualification | [1-5] | 1: High school<br>2: Associate's degree<br>3: Bachelor's degree<br>4: Master's degree<br>5: Doctoral degree                                                                |
| Race                      | [1-7] | 1: White American<br>2: African American<br>3: Hispanic and Latino American<br>4: Asian American<br>5: Native American (including Alaska                                   |

|        |       |                                                                                          |
|--------|-------|------------------------------------------------------------------------------------------|
|        |       | native, native Hawaiian, and other Pacific Islander)<br>6: Two or more races<br>7: Other |
| Sample | [1-3] | 1: ResearchMatch<br>2: OU<br>3: Clemson                                                  |
