# Supplementary material for: Health indicators as a measure of individual health status: public perspectives
Source: bioRxiv or medRxiv preprint supplement (doi:10.1101/2022.03.04.22271701), 2022-03-07
Supplement: Supplementary file [file media-5.pdf]

**Appendix E.** Demographic descriptive statistics for all respondents

|                           |                                                                                       | Frequency<br>(n) | Percent<br>(%) |
|---------------------------|---------------------------------------------------------------------------------------|------------------|----------------|
| Source                    | ResearchMatch                                                                         | 694              | 60.2           |
|                           | Ohio University                                                                       | 362              | 31.4           |
|                           | Clemson University                                                                    | 97               | 8.4            |
|                           | Total                                                                                 | 1153             | 100            |
| Age Group                 | < = 35                                                                                | 464              | 40.2           |
|                           | 36-45                                                                                 | 163              | 14.1           |
|                           | 46-55                                                                                 | 152              | 13.2           |
|                           | 56-65                                                                                 | 201              | 17.4           |
|                           | > 65                                                                                  | 173              | 15             |
|                           | Total                                                                                 | 1153             | 100            |
| Gender                    | Female                                                                                | 862              | 74.8           |
|                           | Male                                                                                  | 273              | 23.7           |
|                           | Transgender                                                                           | 10               | 0.9            |
|                           | Prefer not to answer                                                                  | 8                | 0.7            |
|                           | Total                                                                                 | 1153             | 100            |
| Professional Group        | Healthcare providers                                                                  | 232              | 20.1           |
|                           | Public health professional                                                            | 71               | 6.2            |
|                           | Researcher who uses health indicator data                                             | 78               | 6.8            |
|                           | Other researchers                                                                     | 204              | 17.7           |
|                           | Other professional groups (Specify)                                                   | 568              | 49.3           |
|                           | Total                                                                                 | 1153             | 100            |
| Educational qualification | High school                                                                           | 218              | 18.9           |
|                           | Associate degree                                                                      | 95               | 8.2            |
|                           | College degree                                                                        | 367              | 31.8           |
|                           | Master degree                                                                         | 327              | 28.4           |
|                           | Doctoral degree                                                                       | 146              | 12.7           |
|                           | Total                                                                                 | 1153             | 100            |
| Race                      | White American                                                                        | 1006             | 87.3           |
|                           | African American                                                                      | 38               | 3.3            |
|                           | Hispanic and Latino American                                                          | 25               | 2.2            |
|                           | Asian American                                                                        | 19               | 1.6            |
|                           | Native American (Including Alaska native, native Hawaiian and other Pacific Islander) | 5                | 0.4            |
|                           | Two or more races                                                                     | 23               | 2              |

|  |       |      |     |
|--|-------|------|-----|
|  | Other | 37   | 3.2 |
|  | Total | 1153 | 100 |
