# Supplementary material for: Health indicators as a measure of individual health status: public perspectives
Source: bioRxiv or medRxiv preprint supplement (doi:10.1101/2022.03.04.22271701), 2022-03-07
Supplement: Supplementary file [file media-6.pdf]

**Appendix F.** Total of 9 indicators with homogenous variance

| <b>Health indicator</b>    | <b>Levene test Sig.</b> |
|----------------------------|-------------------------|
| Blood sugar level          | 0.19                    |
| HDL cholesterol            | 0.22                    |
| LDL cholesterol            | 0.21                    |
| Total cholesterol          | 0.83                    |
| Immunization/vaccination   | 0.12                    |
| Insurance coverage         | 0.07                    |
| Cancer screening detection | 0.05                    |
| Air quality index > 100    | 0.14                    |
| Self-rated health status   | 0.34                    |
