# Supplementary material for: Health indicators as a measure of individual health status: public perspectives
Source: bioRxiv or medRxiv preprint supplement (doi:10.1101/2022.03.04.22271701), 2022-03-07
Supplement: Supplementary file [file media-7.pdf]

**Appendix G.** Total of 16 indicators with heterogeneous variance

| <b>Health indicator</b>                   | <b>LevenetTest Sig.</b> |
|-------------------------------------------|-------------------------|
| Blood triglycerides                       | 0.05                    |
| Alcohol abuse                             | 0.004                   |
| Body mass index (BMI)                     | 0.002                   |
| Diet and nutrition                        | 0.001                   |
| Drug or substance abuse                   | 0.00                    |
| Family history of cancer                  | 0.05                    |
| Physical inactivity                       | 0.00                    |
| Smoking, tobacco use                      | 0.00                    |
| Sun protection                            | 0.00                    |
| Personal care needs                       | 0.05                    |
| Hypertension screening                    | 0.00                    |
| HIV testing                               | 0.03                    |
| High school diploma as a health indicator | 0.00                    |
| Supply of dentists                        | 0.03                    |
| Engagement in life                        | 0.00                    |
| Health literacy rate                      | 0.03                    |
| Major depression                          | 0.01                    |
| Having a sense of purpose in one's life   | 0.00                    |
| Race and ethnicity                        | 0.04                    |
| Unemployment                              | 0.01                    |
