# Supplementary material for: Health indicators as a measure of individual health status: public perspectives
Source: bioRxiv or medRxiv preprint supplement (doi:10.1101/2022.03.04.22271701), 2022-03-07
Supplement: Supplementary file [file media-8.pdf]

**Appendix H.** Total of 16 indicators with significant mean differences post hoc results for the three samples

| <b>Health indicator</b>  |               |               | <b>Post hoc Sig.</b> |
|--------------------------|---------------|---------------|----------------------|
| Alcohol abuse            | ResearchMatch | Clemson       | 0.38                 |
|                          | OU            | ResearchMatch | 0.00                 |
|                          | Clemson       | OU            | 0.052                |
| Body mass index (BMI)    | ResearchMatch | Clemson       | 0.70                 |
|                          | OU            | ResearchMatch | 0.00                 |
|                          | Clemson       | OU            | 0.01                 |
| Diet and nutrition       | ResearchMatch | Clemson       | 0.16                 |
|                          | OU            | ResearchMatch | 0.18                 |
|                          | Clemson       | OU            | 0.02                 |
| Drug or substance abuse  | ResearchMatch | Clemson       | 0.10                 |
|                          | OU            | ResearchMatch | 0.00                 |
|                          | Clemson       | OU            | 0.50                 |
| Family history of cancer | ResearchMatch | Clemson       | 0.01                 |
|                          | OU            | ResearchMatch | 0.00                 |
|                          | Clemson       | OU            | 0.88                 |
| Physical inactivity      | ResearchMatch | Clemson       | 0.54                 |
|                          | OU            | ResearchMatch | 0.00                 |
|                          | Clemson       | OU            | 0.45                 |
| Smoking, tobacco use     | ResearchMatch | Clemson       | 0.004                |
|                          | OU            | ResearchMatch | 0.00                 |
|                          | Clemson       | OU            | 0.74                 |

|                                         |               |               |      |
|-----------------------------------------|---------------|---------------|------|
| Sun protection                          | ResearchMatch | Clemson       | 0.00 |
|                                         | OU            | ResearchMatch | 0.00 |
|                                         | Clemson       | OU            | 0.73 |
| Insurance coverage                      | ResearchMatch | Clemson       | 0.02 |
|                                         | OU            | ResearchMatch | 0.12 |
|                                         | Clemson       | OU            | 0.35 |
| Hypertension screening                  | ResearchMatch | Clemson       | 0.75 |
|                                         | OU            | ResearchMatch | 0.01 |
|                                         | Clemson       | OU            | 0.56 |
| Engagement in life                      | ResearchMatch | Clemson       | 1.00 |
|                                         | OU            | ResearchMatch | 0.00 |
|                                         | Clemson       | OU            | 0.00 |
| Major depression                        | ResearchMatch | Clemson       | 0.94 |
|                                         | OU            | ResearchMatch | 0.02 |
|                                         | Clemson       | OU            | 0.46 |
| Having a sense of purpose in one's life | ResearchMatch | Clemson       | 0.47 |
|                                         | OU            | ResearchMatch | 0.00 |
|                                         | Clemson       | OU            | 0.00 |
| Race and ethnicity                      | ResearchMatch | Clemson       | 0.66 |
|                                         | OU            | ResearchMatch | 0.00 |
|                                         | Clemson       | OU            | 0.07 |
| High school diploma                     | ResearchMatch | OU            | 0.00 |

|              |               |               |      |
|--------------|---------------|---------------|------|
|              | OU            | Clemson       | 0.31 |
|              | Clemson       | ResearchMatch | 0.20 |
| Unemployment | ResearchMatch | Clemson       | 0.90 |
|              | OU            | ResearchMatch | 0.00 |
|              | Clemson       | OU            | 0.06 |

IV = the three samples, DV = Individual survey data.
